# Supplementary material
Source: PubMed Central journal article supplement (PMC3311114)
Supplement: NIHMS361785-supplement-01.pdf [file NIHMS361785-supplement-01.pdf]

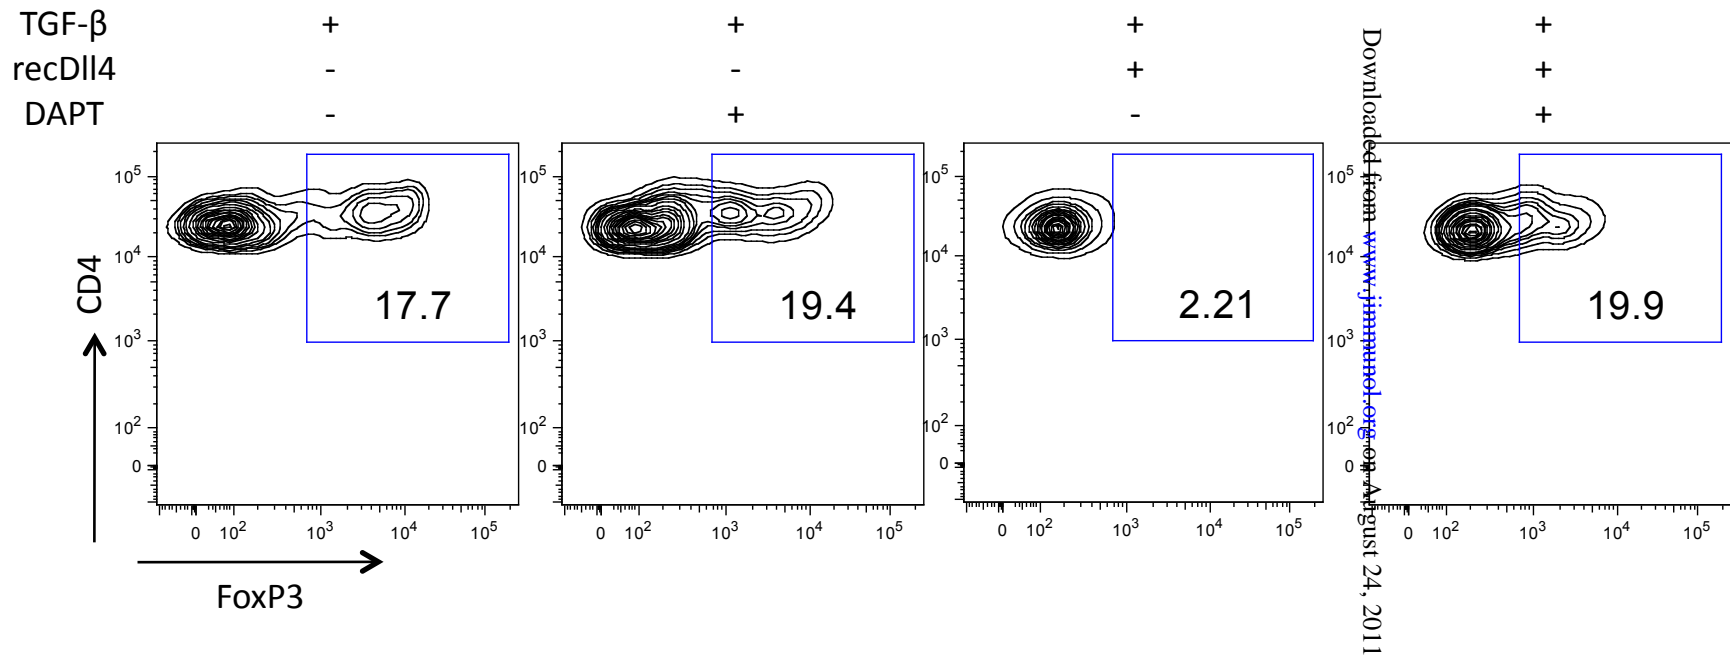

### Supplemental Figure S1. DII4 inhibition of Treg development is Notch dependent

Total CD4<sup>+</sup> T cells were FACS sorted from naive FoxP3.GFP.KI mice and stimulated *in vitro* with plate bound anti-CD3 and anti-CD28 (1 ug/ml) in the presence of plate bound recombinant DII4 (2 ug/ml) and soluble TGF- $\beta$  (3 ng/ml). DAPT (1 uM), a gamma-secretase inhibitor that is also used to block notch signaling was added where indicated. IL-2 (20 ng/ml) was added to the culture medium on day two of culture. Flow cytometry analysis of CD4 and FoxP3 on day 4 of culture show that while treatment with recDII4 inhibits Treg expansion *in vitro*, DAPT abrogates this effect, suggesting that recDII4 inhibition of Treg development is Notch dependent. Results are representative of two independent experiments.

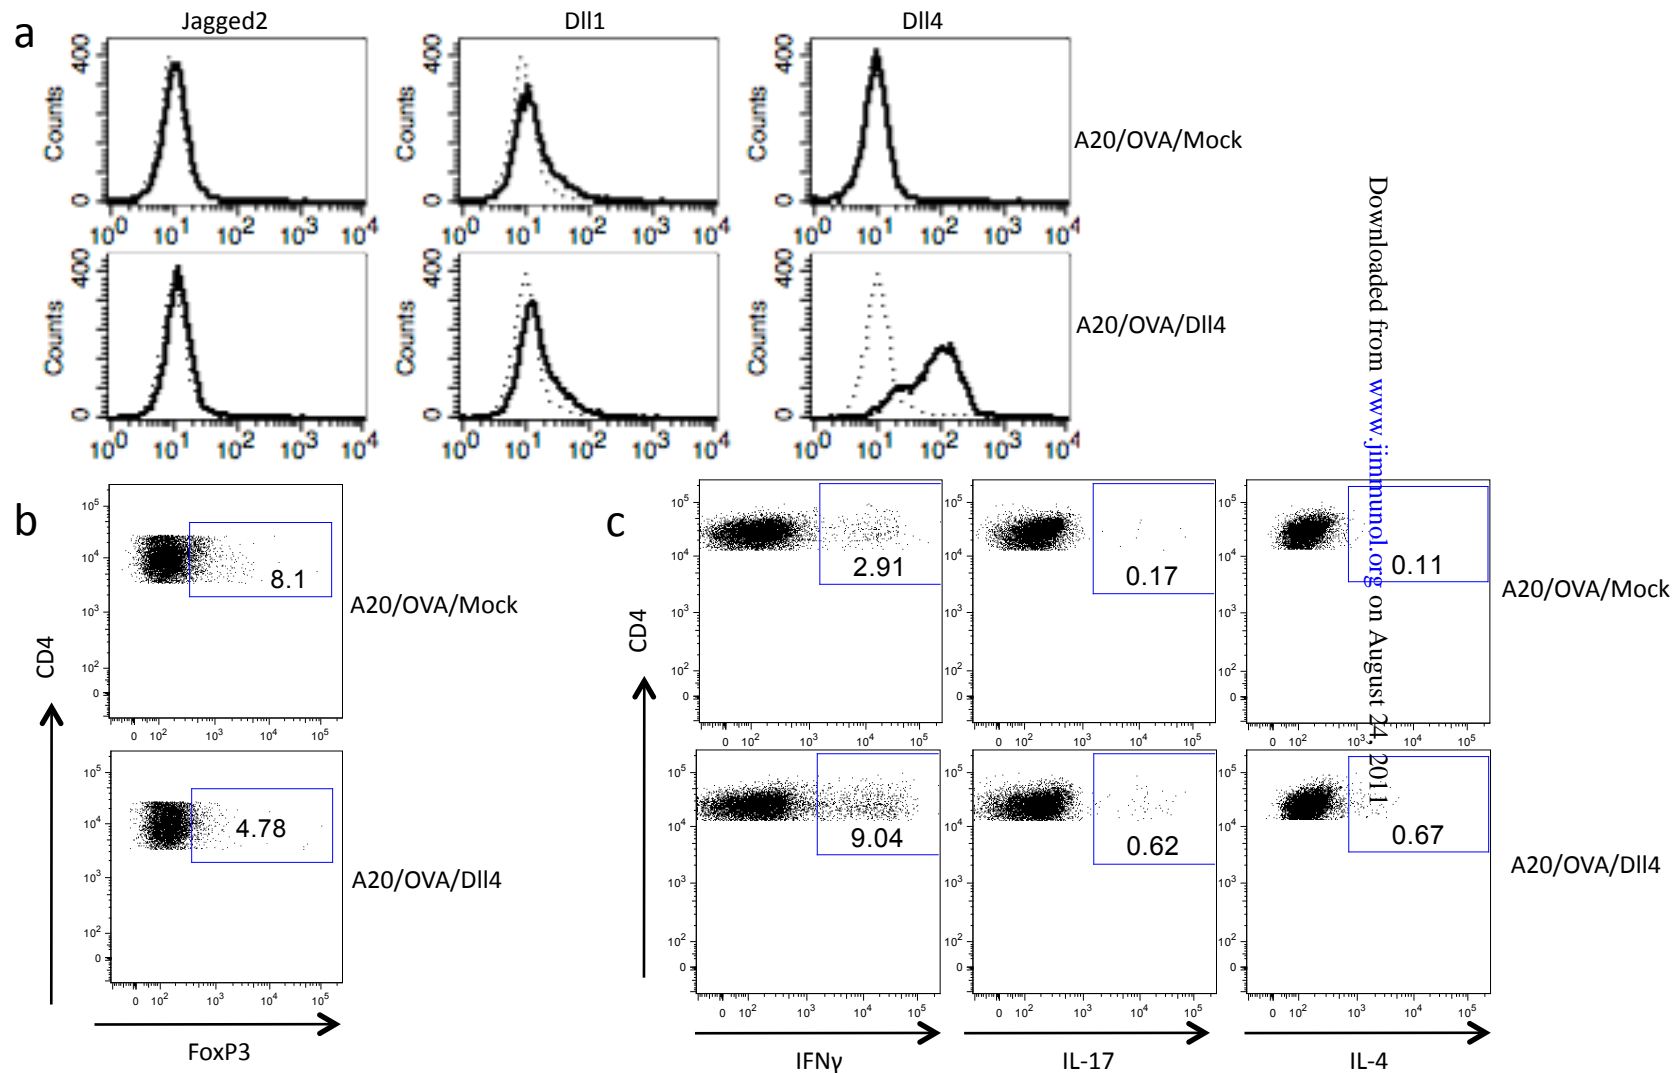

### Supplemental Figure S2. DII4 expression on A20/OVA DII4

(a) DII4 over-expressing A20/OVA B cells or Mock A20/OVA B cells were stained for their surface expression of Jagged2, DII1 and DII4 showing the high specificity of the surface DII4 expression. (b,c) Naïve OVA-specific T cells were isolated by MACS sorting from splenocytes of naïve OVA-TCR<sup>tg</sup> (DO11.10) mice and incubated with irradiated DII4 over-expressing A20/OVA B cells or Mock A20/OVA B cells (1:2 ratio) in complete culture medium in the presence of OVA(323-339) peptide (0.2 $\mu$ g/ml). No recombinant cytokines were added. After one week of culture, cells were re-stimulated with PMA/ionomycin in the presence of monensin for 4 hours. Flow cytometry analysis of IFN- $\gamma$ , IL-17, IL-4 and FoxP3 producing OVA specific T cells shows that under neutral condition DII4 promotes expansion of IFN- $\gamma$  producing cells (c) while suppressing Treg expansion (b).
